# Supplementary material
Source: MDPI journal article supplement (https://www.mdpi.com/2072-4292/15/20/5054)
Supplement: s1 [file s1]

## Supplementary Material

**Table S1.** Remote sensing images used in this study.

| Sensor           | Strip Number      | Date                                                                                                  |
|------------------|-------------------|-------------------------------------------------------------------------------------------------------|
| Landsat-8<br>OLI | Path: 136 Row: 30 | 2016 – 08 – 19; 2017 – 08 – 22;<br>2018 – 08 – 25; 2019 – 08 – 28;<br>2020 – 08 – 30; 2021 – 08 – 17. |
|                  | Path: 136 Row: 31 | 2016 – 08 – 19; 2017 – 08 – 22;<br>2018 – 08 – 25; 2019 – 08 – 28;<br>2020 – 08 – 30; 2021 – 08 – 17. |
|                  | Path: 135 Row: 30 | 2016 – 08 – 12; 2017 – 08 – 15;<br>2018 – 08 – 18; 2019 – 08 – 21;<br>2020 – 08 – 23; 2021 – 08 – 26. |
|                  | Path: 135 Row: 31 | 2016 – 08 – 12; 2017 – 08 – 15;<br>2018 – 08 – 18; 2019 – 08 – 21;<br>2020 – 08 – 23; 2021 – 08 – 26. |
|                  | Path: 135 Row: 32 | 2016 – 08 – 12; 2017 – 08 – 15;<br>2018 – 08 – 18; 2019 – 08 – 21;<br>2020 – 08 – 23; 2021 – 08 – 26. |
|                  | Path: 134 Row: 30 | 2016 – 08 – 21; 2017 – 08 – 24;<br>2018 – 08 – 27; 2019 – 08 – 30;<br>2020 – 08 – 16; 2021 – 08 – 19. |
|                  | Path: 134 Row: 31 | 2016 – 08 – 21; 2017 – 08 – 24;<br>2018 – 08 – 27; 2019 – 08 – 30;<br>2020 – 08 – 16; 2021 – 08 – 19. |
|                  | Path: 134 Row: 32 | 2016 – 08 – 21; 2017 – 08 – 24;<br>2018 – 08 – 27; 2019 – 08 – 30;<br>2020 – 08 – 16; 2021 – 08 – 19. |
|                  | Path: 133 Row: 31 | 2016 – 08 – 14; 2017 – 08 – 17;<br>2018 – 08 – 20; 2019 – 08 – 23;<br>2020 – 08 – 25; 2021 – 08 – 28. |
|                  | Path: 133 Row: 32 | 2016 – 08 – 14; 2017 – 08 – 17;<br>2018 – 08 – 20; 2019 – 08 – 23;<br>2020 – 08 – 25; 2021 – 08 – 28. |
|                  | Path: 133 Row: 33 | 2016 – 08 – 14; 2017 – 08 – 17;<br>2018 – 08 – 20; 2019 – 08 – 23;<br>2020 – 08 – 25; 2021 – 08 – 28. |

|                   |                                                                                                       |
|-------------------|-------------------------------------------------------------------------------------------------------|
| Path: 132 Row: 31 | 2016 – 08 – 23; 2017 – 08 – 26;<br>2018 – 08 – 29; 2019 – 08 – 16;<br>2020 – 08 – 18; 2021 – 08 – 21. |
| Path: 132 Row: 32 | 2016 – 08 – 23; 2017 – 08 – 26;<br>2018 – 08 – 29; 2019 – 08 – 16;<br>2020 – 08 – 18; 2021 – 08 – 21. |
| Path: 132 Row: 33 | 2016 – 08 – 23; 2017 – 08 – 26;<br>2018 – 08 – 29; 2019 – 08 – 16;<br>2020 – 08 – 18; 2021 – 08 – 21. |
| Path: 131 Row: 31 | 2016 – 08 – 16; 2017 – 08 – 19;<br>2018 – 08 – 22; 2019 – 08 – 25;<br>2020 – 08 – 27; 2021 – 08 – 30. |
| Path: 131 Row: 32 | 2016 – 08 – 16; 2017 – 08 – 19;<br>2018 – 08 – 22; 2019 – 08 – 25;<br>2020 – 08 – 27; 2021 – 08 – 30. |
| Path: 131 Row: 33 | 2016 – 08 – 16; 2017 – 08 – 19;<br>2018 – 08 – 22; 2019 – 08 – 25;<br>2020 – 08 – 27; 2021 – 08 – 30. |
| Path: 131 Row: 34 | 2016 – 08 – 16; 2017 – 08 – 19;<br>2018 – 08 – 22; 2019 – 08 – 25;<br>2020 – 08 – 27; 2021 – 08 – 30. |
| Path: 130 Row: 32 | 2016 – 08 – 25; 2017 – 08 – 28;<br>2018 – 08 – 15; 2019 – 08 – 18;<br>2020 – 08 – 20; 2021 – 08 – 23. |
| Path: 130 Row: 33 | 2016 – 08 – 25; 2017 – 08 – 28;<br>2018 – 08 – 15; 2019 – 08 – 18;<br>2020 – 08 – 20; 2021 – 08 – 23. |
| Path: 130 Row: 34 | 2016 – 08 – 25; 2017 – 08 – 28;<br>2018 – 08 – 15; 2019 – 08 – 18;<br>2020 – 08 – 20; 2021 – 08 – 23. |
| Path: 129 Row: 32 | 2016 – 08 – 18; 2017 – 08 – 21;<br>2018 – 08 – 24; 2019 – 08 – 27;<br>2020 – 08 – 13; 2021 – 08 – 16. |
| Path: 129 Row: 33 | 2016 – 08 – 18; 2017 – 08 – 21;<br>2018 – 08 – 24; 2019 – 08 – 27;<br>2020 – 08 – 13; 2021 – 08 – 16. |
| Path: 129 Row: 34 | 2016 – 08 – 18; 2017 – 08 – 21;<br>2018 – 08 – 24; 2019 – 08 – 27;<br>2020 – 08 – 13; 2021 – 08 – 16. |

---
